# Supplementary material for: Effects of Ramadan Observance on Dietary Intake and Body Composition of Adolescent Athletes: Systematic Review and Meta-Analysis
Source: MDPI journal article supplement (doi:10.3390/nu12061574), 2020-05-28
Supplement: s1 [file s1]

## Supplementary files

**Table S1.** Quality assessment of body composition.

| Study                | Question described | Appropriate study design | Appropriate subject selection | Characteristics described | Random allocation | Researchers blinded | Subjects blinded | Outcome measures well defined and robust to bias | Sample size appropriate | Analytic methods well described | Estimate of variance reported | Controlled for confounding | Results reported in detail | Conclusion supported by results? | Rating | Study quality |
|----------------------|--------------------|--------------------------|-------------------------------|---------------------------|-------------------|---------------------|------------------|--------------------------------------------------|-------------------------|---------------------------------|-------------------------------|----------------------------|----------------------------|----------------------------------|--------|---------------|
| Maughan et al. [41]  | 2                  | 1                        | 2                             | 2                         | n/a               | n/a                 | n/a              | 2                                                | 2                       | 2                               | 2                             | 1                          | 2                          | 2                                | 90.9   | strong        |
| Meckel et al. [42]   | 2                  | 0                        | 1                             | 1                         | n/a               | n/a                 | n/a              | 1                                                | 1                       | 1                               | 2                             | 0                          | 2                          | 2                                | 59.1   | moderate      |
| Lofli et al. [45]    | 2                  | 0                        | 1                             | 1                         | n/a               | n/a                 | n/a              | 1                                                | 2                       | 1                               | 2                             | 0                          | 2                          | 2                                | 63.6   | moderate      |
| Güvenç [48]          | 2                  | 0                        | 1                             | 2                         | n/a               | n/a                 | n/a              | 1                                                | 1                       | 1                               | 2                             | 0                          | 2                          | 2                                | 63.6   | moderate      |
| Aziz et al. [43]     | 2                  | 1                        | 1                             | 2                         | n/a               | n/a                 | n/a              | 1                                                | 1                       | 1                               | 2                             | 0                          | 2                          | 2                                | 68.2   | moderate      |
| Aziz et al. [44]     | 2                  | 1                        | 1                             | 2                         | n/a               | n/a                 | n/a              | 1                                                | 1                       | 1                               | 2                             | 0                          | 2                          | 2                                | 68.2   | moderate      |
| Aloui et al. [53]    | 2                  | 0                        | 1                             | 1                         | n/a               | n/a                 | n/a              | 1                                                | 1                       | 1                               | 2                             | 0                          | 2                          | 2                                | 59.1   | moderate      |
| Hammouda et al. [46] | 2                  | 0                        | 1                             | 2                         | n/a               | n/a                 | n/a              | 1                                                | 1                       | 1                               | 2                             | 0                          | 2                          | 2                                | 63.6   | moderate      |
| Bouhleb et al. [49]  | 2                  | 0                        | 1                             | 1                         | n/a               | n/a                 | n/a              | 1                                                | 1                       | 1                               | 2                             | 0                          | 2                          | 2                                | 59.1   | moderate      |
| Hammouda et al. [47] | 2                  | 0                        | 1                             | 2                         | n/a               | n/a                 | n/a              | 1                                                | 1                       | 1                               | 2                             | 0                          | 2                          | 2                                | 63.6   | moderate      |
| Bouhleb et al. [50]  | 2                  | 0                        | 1                             | 2                         | n/a               | n/a                 | n/a              | 1                                                | 1                       | 1                               | 2                             | 0                          | 2                          | 2                                | 63.6   | moderate      |
| Zarrouk et al. [51]  | 2                  | 0                        | 1                             | 2                         | n/a               | n/a                 | n/a              | 1                                                | 1                       | 1                               | 2                             | 0                          | 2                          | 2                                | 63.6   | moderate      |
| % of lost points     | 0                  | 87.5                     | 45.8                          | 16.6                      | n/a               | n/a                 | n/a              | 45.8                                             | 41.6                    | 45.8                            | 0                             | 95.8                       | 0                          | 0                                |        |               |

n/a: not applicable.

1 **Table S2.** Quality assessment of dietary intake.

| Study                | Question described | Appropriate study design | Appropriate subject selection | Characteristics described | Random allocation | Researchers blinded | Subjects blinded | Outcome measures well defined and robust to bias | Sample size appropriate | Analytic methods well described | Estimate of variance reported | Controlled for confounding | Results reported in detail | Conclusion supported by results? | Rating | Study quality |
|----------------------|--------------------|--------------------------|-------------------------------|---------------------------|-------------------|---------------------|------------------|--------------------------------------------------|-------------------------|---------------------------------|-------------------------------|----------------------------|----------------------------|----------------------------------|--------|---------------|
| Maughan et al. [41]  | 2                  | 1                        | 2                             | 2                         | n/a               | n/a                 | n/a              | 2                                                | 2                       | 2                               | 2                             | 1                          | 2                          | 2                                | 90.9   | Strong        |
| Meckel et al. [42]   | 2                  | 0                        | 1                             | 1                         | n/a               | n/a                 | n/a              | 2                                                | 1                       | 1                               | 2                             | 1                          | 1                          | 1                                | 59.09  | Moderate      |
| Güvenç. [48]         | 2                  | 0                        | 1                             | 2                         | n/a               | n/a                 | n/a              | 2                                                | 2                       | 1                               | 2                             | 1                          | 2                          | 2                                | 77.27  | Strong        |
| Aziz et al. [43]     | 2                  | 1                        | 1                             | 2                         | n/a               | n/a                 | n/a              | 1                                                | 1                       | 2                               | 2                             | 1                          | 2                          | 2                                | 77.27  | Strong        |
| Aloui et al. [53]    | 2                  | 0                        | 1                             | 1                         | n/a               | n/a                 | n/a              | 2                                                | 1                       | 1                               | 2                             | 1                          | 2                          | 2                                | 68.18  | Moderate      |
| Hammouda et al. [46] | 2                  | 0                        | 1                             | 2                         | n/a               | n/a                 | n/a              | 0                                                | 1                       | 1                               | 1                             | 1                          | 2                          | 2                                | 59.09  | Moderate      |
| Bouhleb et al. [49]  | 2                  | 0                        | 1                             | 1                         | n/a               | n/a                 | n/a              | 0                                                | 1                       | 1                               | 2                             | 1                          | 2                          | 2                                | 59.09  | Moderate      |
| Hammouda et al. [47] | 2                  | 0                        | 1                             | 2                         | n/a               | n/a                 | n/a              | 1                                                | 1                       | 1                               | 2                             | 1                          | 2                          | 2                                | 68.18  | Moderate      |
| Bouhleb et al. [50]  | 2                  | 0                        | 1                             | 2                         | n/a               | n/a                 | n/a              | 0                                                | 1                       | 1                               | 2                             | 1                          | 2                          | 2                                | 63.63  | Moderate      |
| Zarrouk et al. [52]  | 2                  | 0                        | 1                             | 2                         | n/a               | n/a                 | n/a              | 2                                                | 1                       | 2                               | 2                             | 1                          | 2                          | 2                                | 77.27  | Strong        |
| % of lost points     | 0                  | 90                       | 45                            | 15                        | n/a               | n/a                 | n/a              | 40                                               | 40                      | 35                              | 5                             | 50                         | 5                          | 5                                | -      | -             |

2 n/a: not applicable.

3 **Table S3.** Training characteristics of the included studies.

| Studies              | Activity                          | Level of practice        | Time of day of training during Ramadan    | Number of training sessions | Duration of training sessions (h) | Timing of measurement              | Training program                                                        |
|----------------------|-----------------------------------|--------------------------|-------------------------------------------|-----------------------------|-----------------------------------|------------------------------------|-------------------------------------------------------------------------|
| Maughan et al. [41]  | Soccer                            | First and third division | In the afternoon before breaking the fast | 7                           | 1                                 | In the morning<br>In the afternoon | Training program maintained during compared to before Ramadan           |
| Meckel et al. [42]   | Soccer                            | Amateur                  | -                                         | -                           | -                                 | -                                  | High intensities activities decreased during compared to before Ramadan |
| Lotfi et al. [45]    | Soccer<br>Running                 | Professional             | -                                         | 3                           | -                                 | -                                  | -                                                                       |
| Güvenç [48]          | Soccer                            | Amateur                  | After breaking the fast                   | 3                           | 2                                 | In the afternoon                   | Training program maintained during compared to before Ramadan           |
| Aziz et al. [43]     | Soccer or basketball              | Amateur                  | Before breaking the fast                  | 3                           | 1                                 | -                                  |                                                                         |
| Aziz et al. [44]     | Martial arts sport of pencaksilat | Amateur                  | In the late afternoon or evening          | 3-4                         | 1-1.5                             | 08h00<br>18h00<br>21h00            |                                                                         |
| Hammouda et al. [46] | Soccer                            | Professional             | After breaking the fast                   | 4                           | 2                                 | In the morning                     |                                                                         |
| Zarrouk et al. [51]  | Karate                            | Amateur                  | After breaking the fast                   | 5                           | 2                                 | In the afternoon                   |                                                                         |
| Bouhlel et al. [49]  | Karate                            | Amateur                  | -                                         | 5                           | 2                                 | -                                  |                                                                         |
| Hammouda et al. [47] | Karate                            | Amateur                  | -                                         | 5                           | 2                                 | -                                  |                                                                         |
| Bouhlel et al. [50]  | Boxing                            | Amateur                  | -                                         | 5                           | 1.5                               | In the afternoon                   |                                                                         |
| Zarrouk et al. [52]  | Karate                            | Amateur                  | After breaking the fast                   | 5                           | 2                                 | -                                  |                                                                         |

4

**Table S4.**Effect of Ramadan fasting on body mass.

| Studies              | Sample size  | Age  | Country   | Year of experimental protocol | Fasting hours | Study design                      | Measured parameter | Effect                                    |
|----------------------|--------------|------|-----------|-------------------------------|---------------|-----------------------------------|--------------------|-------------------------------------------|
| Maughan et al. [41]  | 34 (a.m)     | 18.5 | Tunisia   | 2006                          | 14.5          | Pre/post-control                  | Body mass (kg)     | ↔                                         |
|                      | 25 (p.m)     |      |           |                               |               |                                   |                    | ↔                                         |
| Meckel et al. [42]   | 19           | 15.1 | Israel    | -                             | -             | Pre/post                          | Body mass (kg)     | ↔                                         |
| Lotfi et al. [45]    | 10 (soccer)  | 15.8 | Morocco   | -                             | -             | Pre/post                          | Body mass (kg)     | ↔                                         |
|                      | 17 (runners) | 16.8 |           |                               |               |                                   |                    | ↑ 2.85% at R1 and ↑ 2.74% at R4 vs. Bef-R |
| Güvenç [48]          | 16           | 17.4 | Turkey    | -                             | -             | Pre/post                          | Body mass (kg)     | ↔                                         |
| Aziz et al. [43]     | 10           | 17.5 | Singapore | -                             | 13.5          | Pre/post-control                  | Body mass (kg)     | ↔                                         |
| Aziz et al. [44]     | 9            | 18.9 | Singapore | -                             | 13.7          | Counterbalanced cross-over design | Body mass (kg)     | ↔                                         |
|                      |              |      |           |                               |               |                                   |                    | ↓ 2.08% at Ramadan vs. Bef-R              |
| Hammouda et al. [46] | 15           | 17.3 | Tunisia   | 2010                          | 15.5          | Pre/post                          | Body mass (kg)     | ↓ 1.96% at R2 and ↓ 3.60% at R4 vs. Bef-R |
| Zarrouk et al. [51]  | 8            | 17.2 | Tunisia   | 2009                          | 14            | Pre/post                          | Body mass (kg)     | ↔                                         |
| Bouhlel et al. [49]  | 10           | 18.5 | Tunisia   | -                             | -             | Pre/post                          | Body mass (kg)     | ↔                                         |
| Hammouda et al. [34] | 10           | 18.5 | Tunisia   | -                             | -             | Pre/post                          | Body mass (kg)     | ↓ 2.81 at R2. and ↓ 4.14% at R4 vs. Bef-R |
| Bouhlel et al. [50]  | 10           | 18.8 | Tunisia   | 2011                          | 15            | Pre/post                          | Body mass (kg)     | ↓ 1% at R4 vs. Bef-R                      |
| Zarrouk et al. [52]  | 8            | 17.2 | Tunisia   | 2009                          | 14            | *Pre/post                         | Body mass (kg)     | ↔                                         |

NM = not mentioned; ↓ = decrease; ↔ = no-change; ↑ = increase; vs.= versus; Bef-R = Before Ramadan; R1 = First week of Ramadan; R2 = Second week of Ramadan; R4 = Fourth week of Ramadan.

5  
6  
7  
8

9 **Table S5.** Effect of Ramadan fasting on body composition.

| Studies              | Sample size | Age  | Country | Year of experimental protocol | Fasting hours | Study design     | Measured parameters | Effect                  |
|----------------------|-------------|------|---------|-------------------------------|---------------|------------------|---------------------|-------------------------|
| Maughan et al. [41]  | 34 (a.m)    | 18.5 | Tunisia | 2006                          | 14.5          | Pre/post-control | Body fat (%)        | ↔                       |
|                      | 25 (p.m)    |      |         |                               |               |                  | ↔                   |                         |
| Güvenç [48]          | 16          | 17.4 | Turkey  |                               |               | Pre/post         | Body fat (%)        | ↔                       |
|                      |             |      |         |                               |               |                  | Fat-free mass (Kg)  | ↔                       |
| Hammouda et al. [46] | 15          | 17.3 | Tunisia | 2010                          | 15.5          | Pre/post         | Fat mass (%)        | ↓ 3.7% at R4 vs. Bef-R  |
|                      |             |      |         |                               |               |                  | Lean mass (kg)      | ↔                       |
| Zarrouk et al. [51]  | 8           | 17.2 | Tunisia | 2009                          | 14            | Pre/post         | Fat mass (kg)       | ↔                       |
|                      |             |      |         |                               |               |                  | Lean mass (kg)      | ↔                       |
| Bouhlel et al. [49]  | 10          | 18.5 | Tunisia |                               |               | Pre/post         | Fat mass (kg)       | ↔                       |
| Hammouda et al. [47] | 10          | 18.5 | Tunisia |                               |               | Pre/post         | Fat mass (kg)       | ↓ 6.71% at R4 vs. Bef-R |
|                      |             |      |         |                               |               |                  | Body fat (%)        | ↔                       |
| Bouhlel et al. [50]  | 10          | 18.8 | Tunisia | 2011                          | 15            | Pre/post         | Fat mass (kg)       | ↔                       |
|                      |             |      |         |                               |               |                  | Fat- free mass (kg) | ↓ 2.71% at R4 vs. Bef-R |

10 NM = not mentioned; ↓ = decrease; ↔ = no-change; ↑ = increase; vs.= versus; Bef-R = Before Ramadan; R4 = Fourth week of Ramadan.

**Table S6.** Effect of Ramadan fasting on dietary intake.

| Studies              | Sample size | Age   | Country   | Year of experimental protocol | Fasting hours | Study design     | Supervision by their coaches | dietary intake | Method of measurement  | Effect                    |
|----------------------|-------------|-------|-----------|-------------------------------|---------------|------------------|------------------------------|----------------|------------------------|---------------------------|
| Maughan et al. [41]  | 59          | 18.5  | Tunisia   | 2006                          | 14.5          | Pre/post-control | Yes                          | Caloric intake | 3-day record+interview | ↔                         |
|                      |             |       |           |                               |               |                  |                              | Proteins       |                        | ↑ 7.93% at Dur-R vs.Bef-R |
|                      |             |       |           |                               |               |                  |                              | Fat            |                        | ↔                         |
|                      |             |       |           |                               |               |                  |                              | Carbohydrate   |                        | ↔                         |
|                      |             |       |           |                               |               |                  |                              | Water intake   |                        | ↔                         |
| Meckel et al. [42]   | 10          | 15.1  | Israel    | -                             | -             | Pre/post         | Yes                          | Caloric intake | 2-day record           | ↔                         |
| Güvenç [48]          | 16          | 16    | Turkey    | -                             | -             | Pre/post         | Nm                           | Caloric intake | 2-day record           | ↔                         |
| Aziz et al. [43]     | 10          | 17.5  | Singapore | -                             | 13.5          | Pre/post-control | Nm                           | Caloric intake | 3-day record           | ↔                         |
|                      |             |       |           |                               |               |                  |                              | Proteins       |                        | ↔                         |
|                      |             |       |           |                               |               |                  |                              | Fat            |                        | ↔                         |
|                      |             |       |           |                               |               |                  |                              | Carbohydrate   |                        | ↔                         |
|                      |             |       |           |                               |               |                  |                              | Water intake   |                        | ↔                         |
| Aloui et al. [53]    | 12          | 13.3  | Tunisia   | -                             | 15            | Pre/post         | Nm                           | Caloric intake | 3-day record           | ↔                         |
| Hammouda et al. [46] | 15          | 17.3  | Tunisia   | 2010                          | 15.5          | Pre/post         | Yes                          | Caloric intake | 7-day record           | ↓ 15.29% Dur-R vs.Bef-R   |
|                      |             |       |           |                               |               |                  |                              | Proteins       |                        | ↔                         |
|                      |             |       |           |                               |               |                  |                              | Fat            |                        | ↓ 6.46% Dur-R vs.Bef-R    |
|                      |             |       |           |                               |               |                  |                              | Carbohydrate   |                        | ↔                         |
| Bouhlel et al. [49]  | 10          | 18.5  | Tunisia   | -                             | -             | Pre/post         | Nm                           | Caloric intake | 7-day record           | ↓ 21.30% Dur-R vs.Bef-R   |
|                      |             |       |           |                               |               |                  |                              | Water intake   |                        | ↓ 18.18% Dur-R vs.Bef-R   |
| Hammouda et al. [47] | 12          | 17.52 | Tunisia   | 2010                          | 15.5          | Pre/post         | Nm                           | Caloric intake | 7-day record           | ↓ 14.30% Dur-R vs.Bef-R   |
|                      |             |       |           |                               |               |                  |                              | Proteins       |                        | ↔                         |
|                      |             |       |           |                               |               |                  |                              | Fat            |                        | ↓ 6.21% Dur-R vs.Bef-R    |
|                      |             |       |           |                               |               |                  |                              | Carbohydrate   |                        | ↔                         |
| Bouhlel et al.       | 10          | 18.8  | Tunisia   | 2011                          | 15            | Pre/post         | Nm                           | Caloric intake | 7-day record           | ↓ 3.75% Dur-R vs.Bef-R    |

|                        |   |      |         |      |    |          |     |                           |                |                         |
|------------------------|---|------|---------|------|----|----------|-----|---------------------------|----------------|-------------------------|
| [50]                   |   |      |         |      |    |          |     |                           | Proteins       | ↓ 23.47% Dur-R vs.Bef-R |
|                        |   |      |         |      |    |          |     |                           | Fat            | ↓ 19.72% Dur-R vs.Bef-R |
|                        |   |      |         |      |    |          |     |                           | Carbohydrate   | ↑ 12.68% Dur-R vs.Bef-R |
|                        |   |      |         |      |    |          |     |                           | Water intake   | ↓ 16.66% Dur-R vs.Bef-R |
|                        |   |      |         |      |    |          |     |                           | Caloric intake | ↑ 18.90% Dur-R vs.Bef-R |
| Zarrouk et al.<br>[52] | 8 | 17.2 | Tunisia | 2009 | 14 | Pre/post | Yes |                           | Proteins       | ↔                       |
|                        |   |      |         |      |    |          |     | 3-day<br>record+interview | Fat            | ↑ 28.84% Dur-R vs.Bef-R |
|                        |   |      |         |      |    |          |     |                           | Carbohydrate   | ↔                       |
|                        |   |      |         |      |    |          |     |                           | Water intake   | ↑ 18.18% Dur-R vs.Bef-R |

12 NM = not mentioned; ↓ = decrease; ↔ = no-change; ↑ = increase; vs.= versus; Bef-R = Before Ramadan; Dur-R = During Ramadan.

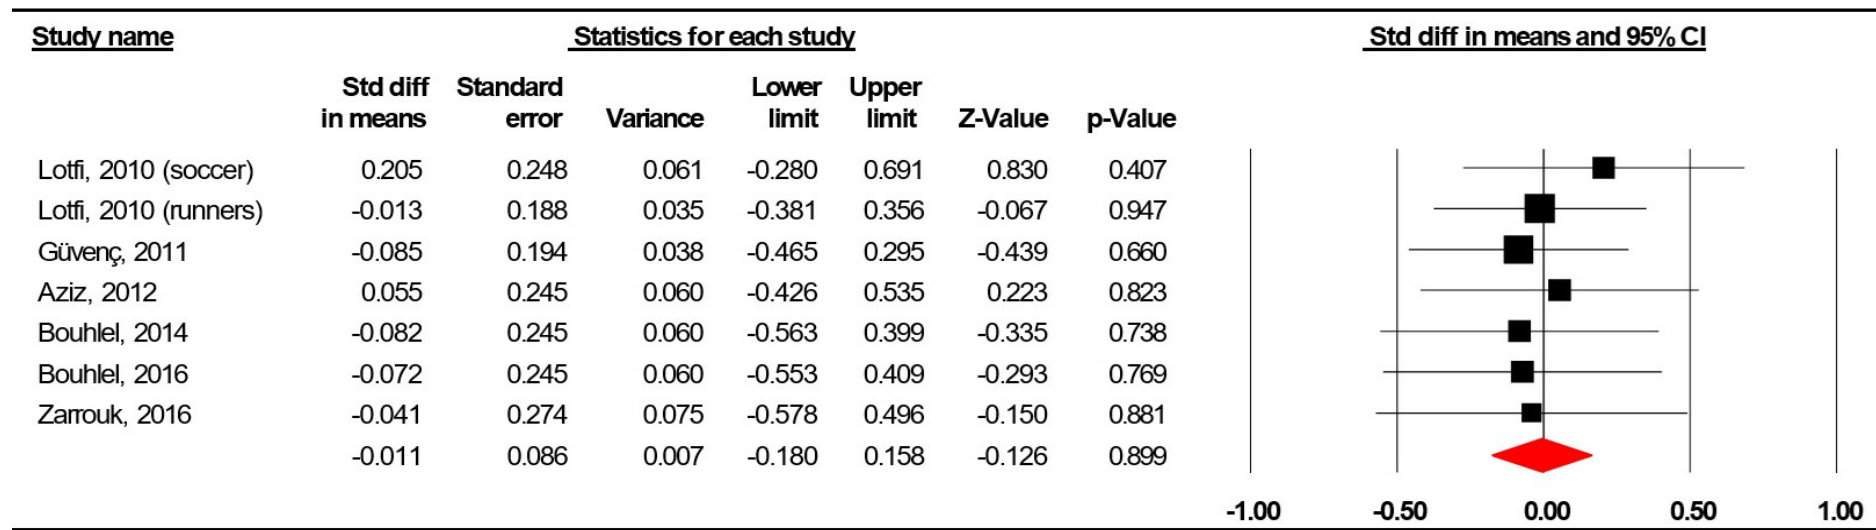

**Figure S1.** Forest plot for the effect of one week of Ramadan observance on body mass in adolescent athletes.



**Funnel Plot of Standard Error by Std diff in means**

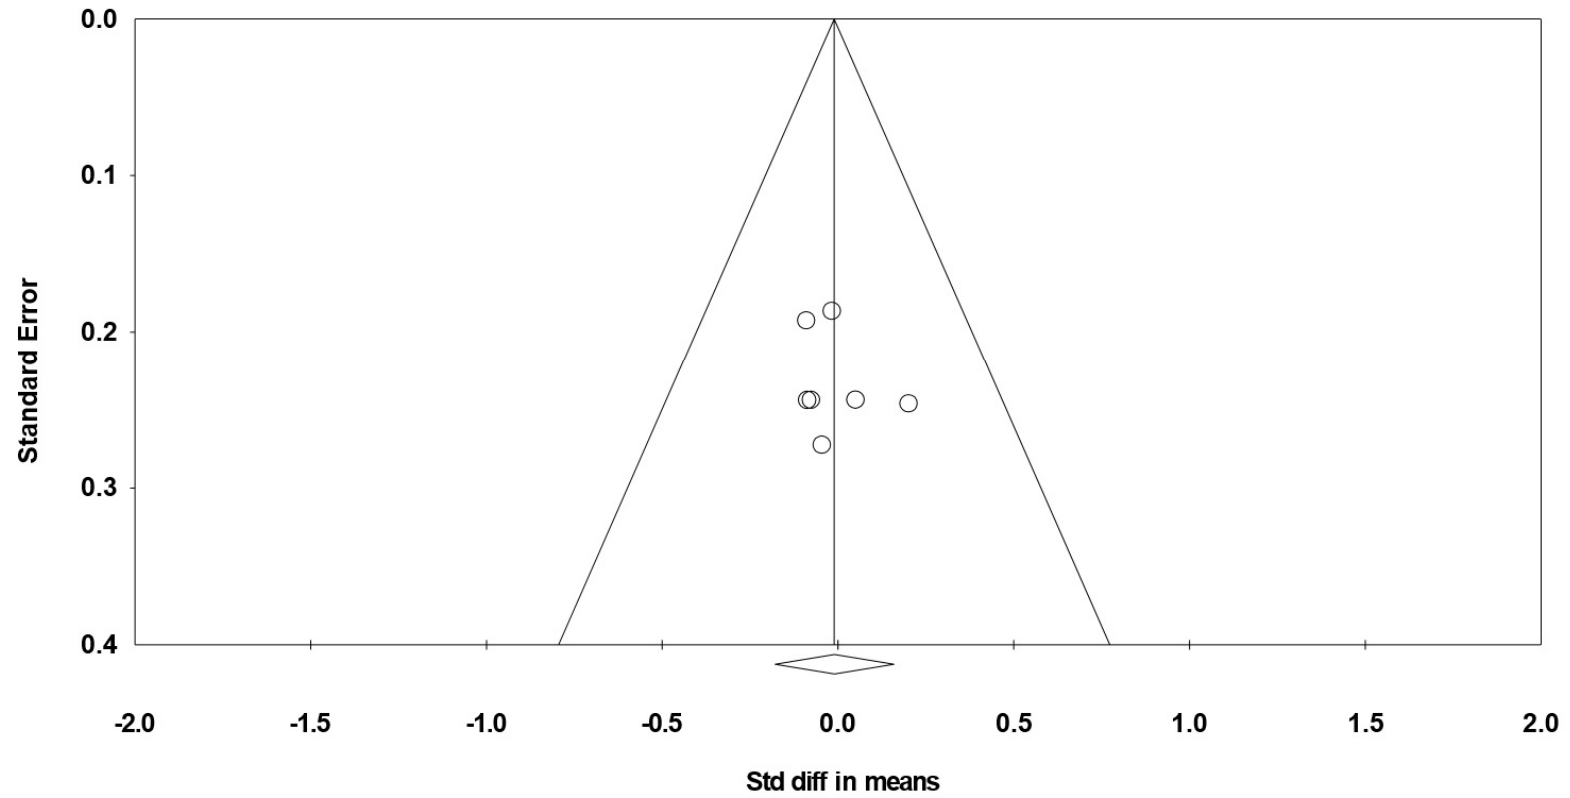

**Figure S2.** Funnel plot of body mass for adolescent athletes during the first week of Ramadan observance showing no evidence of publication bias.

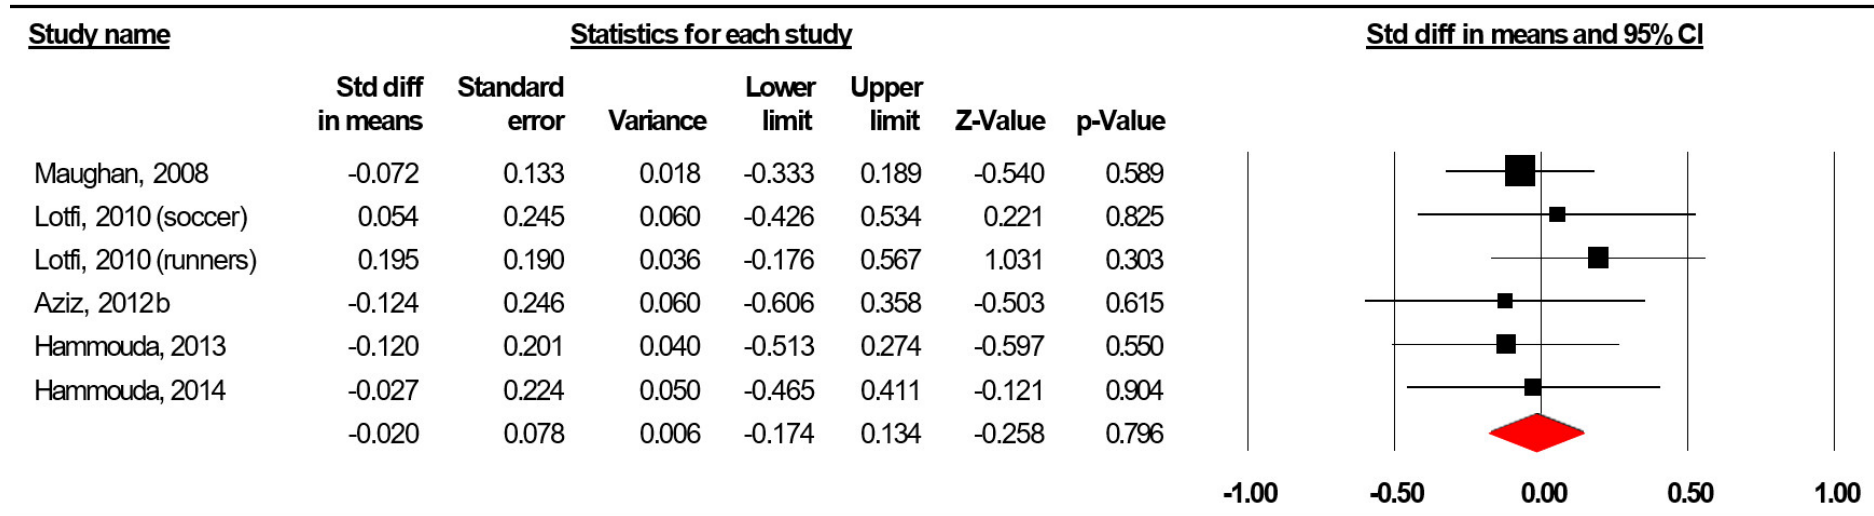

Figure S3. Forest plot for the effect of two weeks of Ramadan observance on body mass in adolescent athletes.

### Funnel Plot of Standard Error by Std diff in means

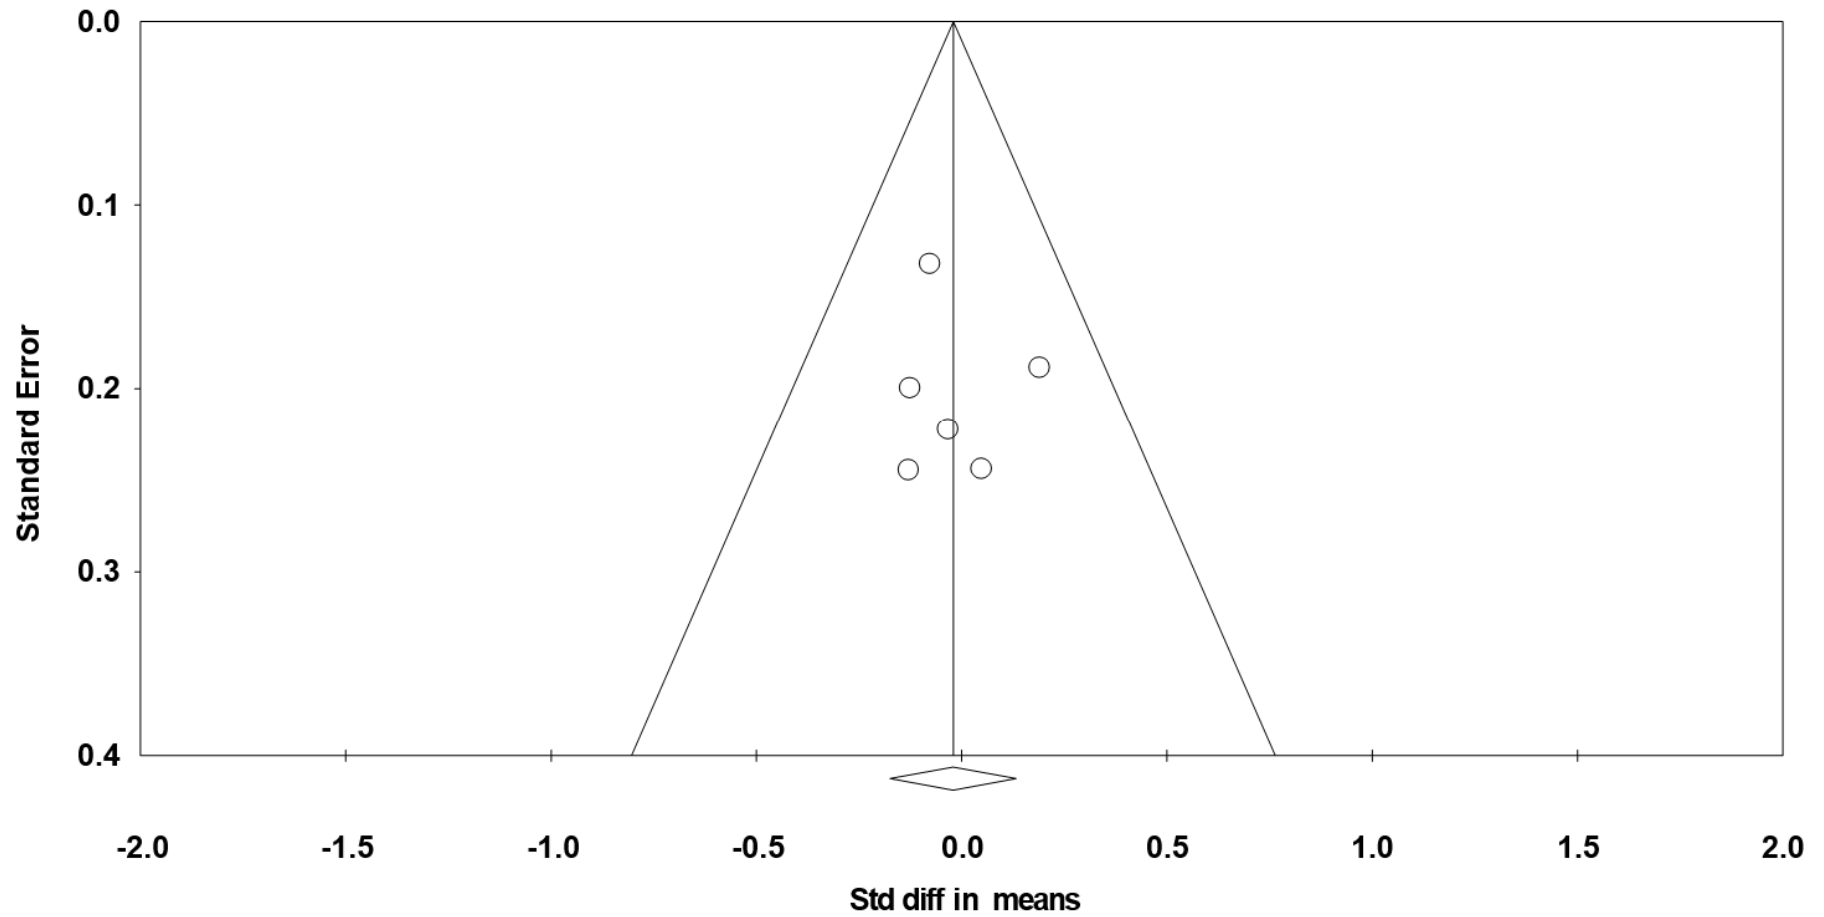

Figure S4. Funnel plot for body mass in adolescent athletes during the second week of Ramadan observance, showing no evidence of publication bias.

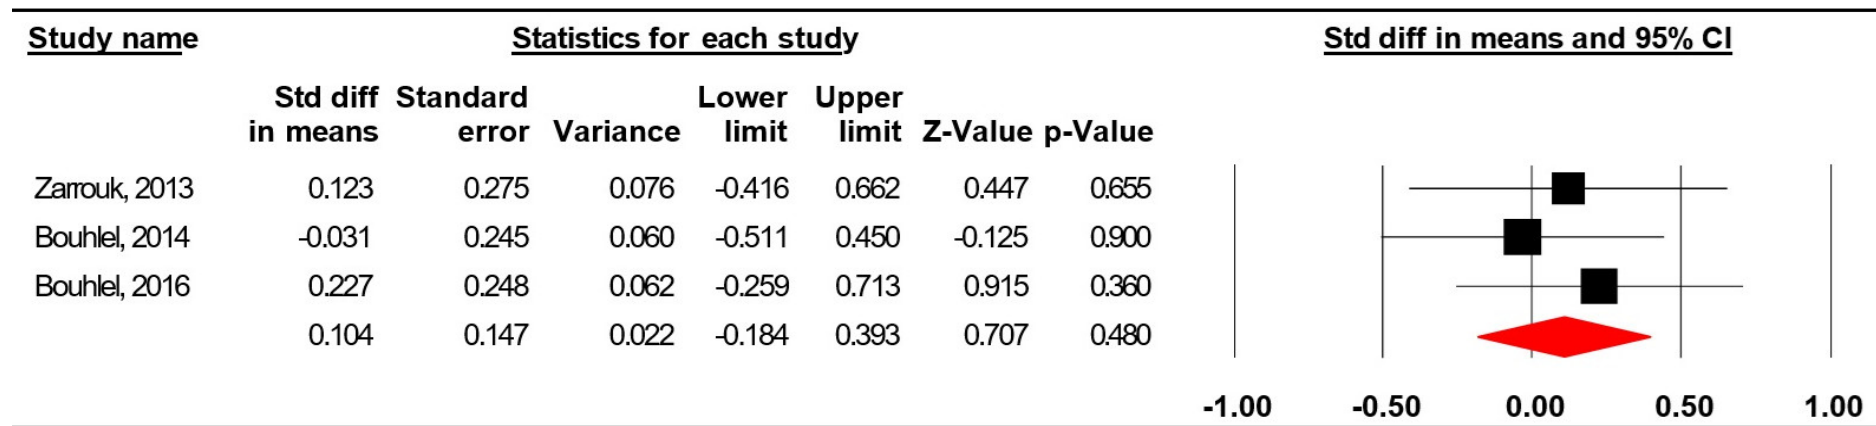

**Figure S5.** Forest plot for the effect of one week of Ramadan observance on body fat mass in adolescent athletes.

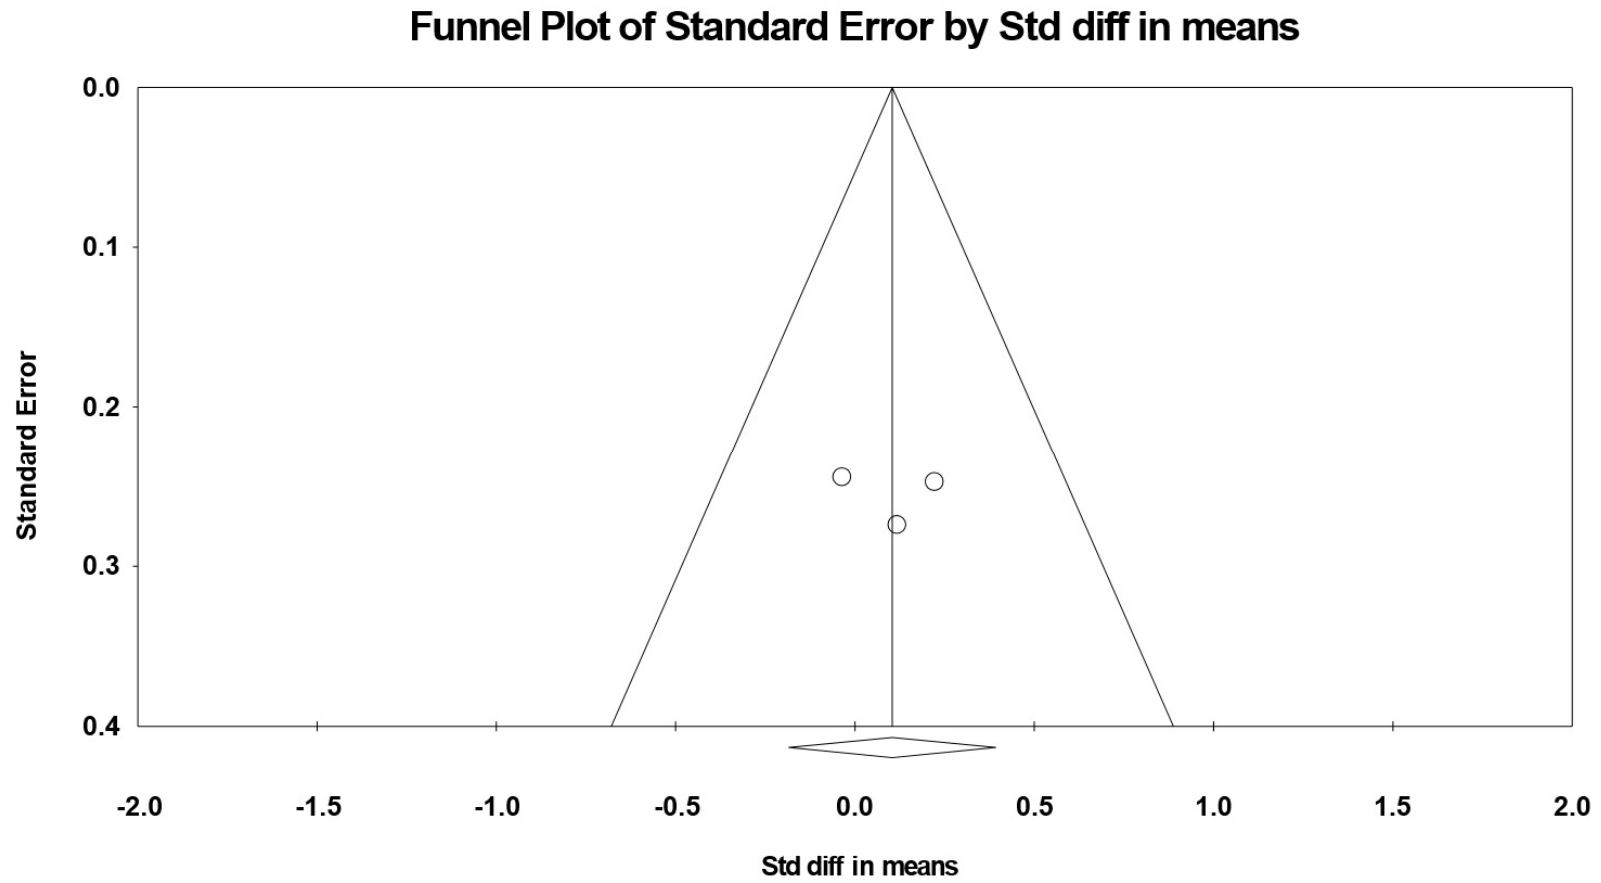

**Figure S6.** Funnel plot for body fat mass in adolescent athletes during the first week of Ramadan observance, showing no evidence of publication bias.

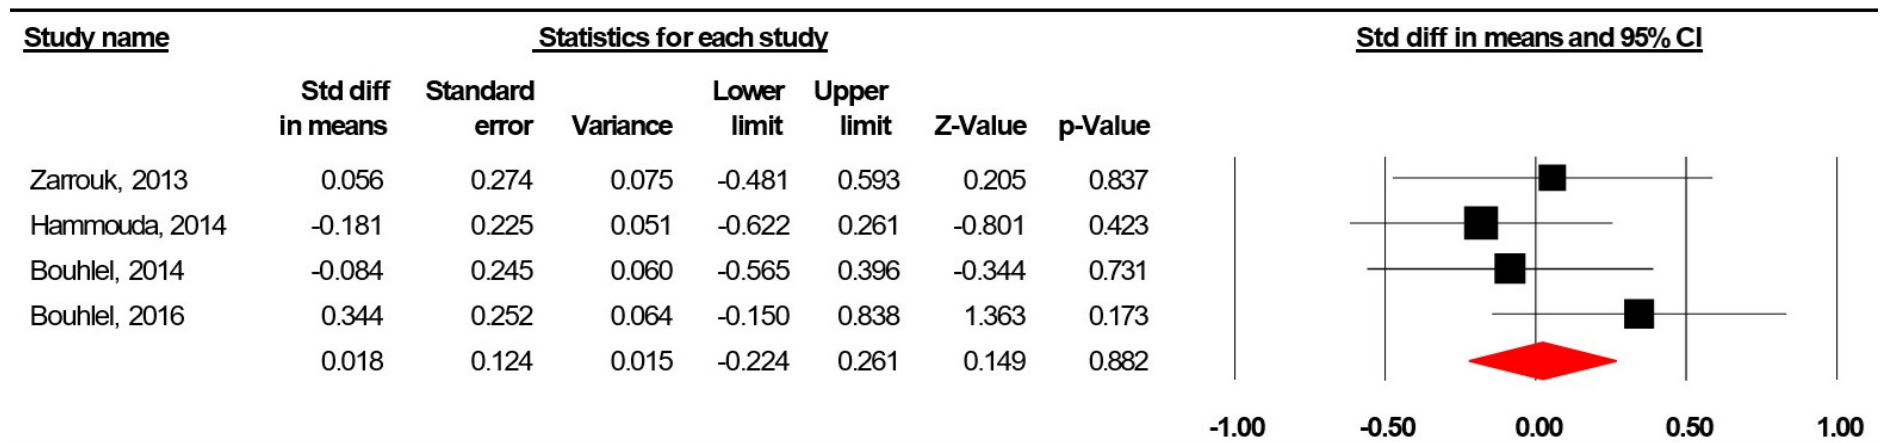

**Figure S7.** Forest plot for the effect of four weeks of Ramadan observance on body fat mass in adolescent athletes.

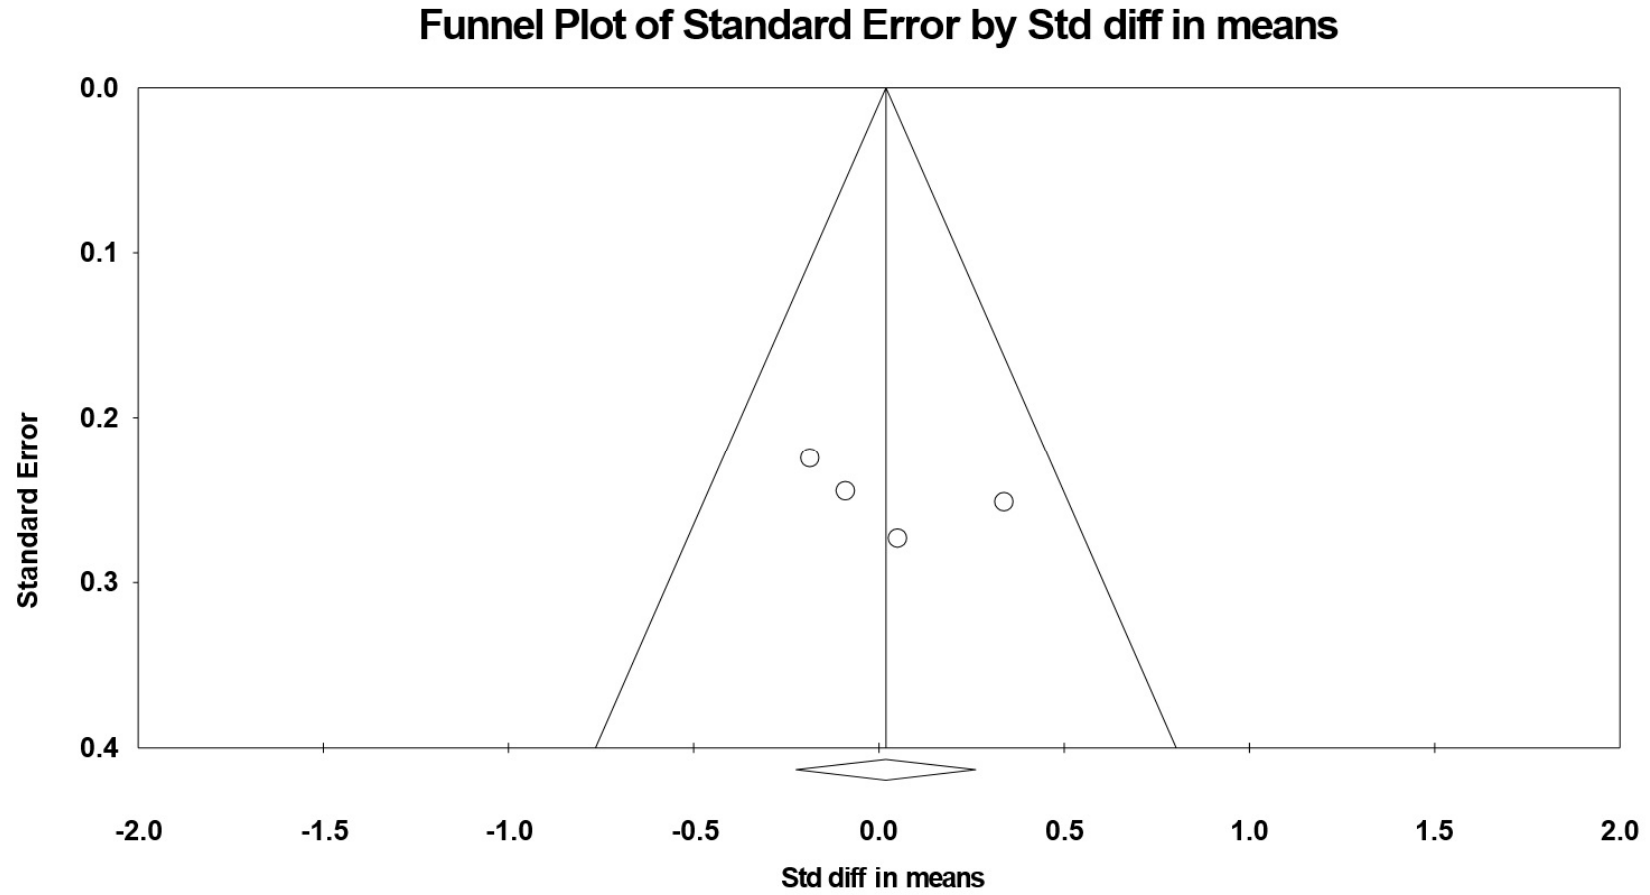

**Figure S8.** Funnel plot for body fat mass in adolescent athletes during the fourth week of Ramadan observance, showing no evidence of publication bias.

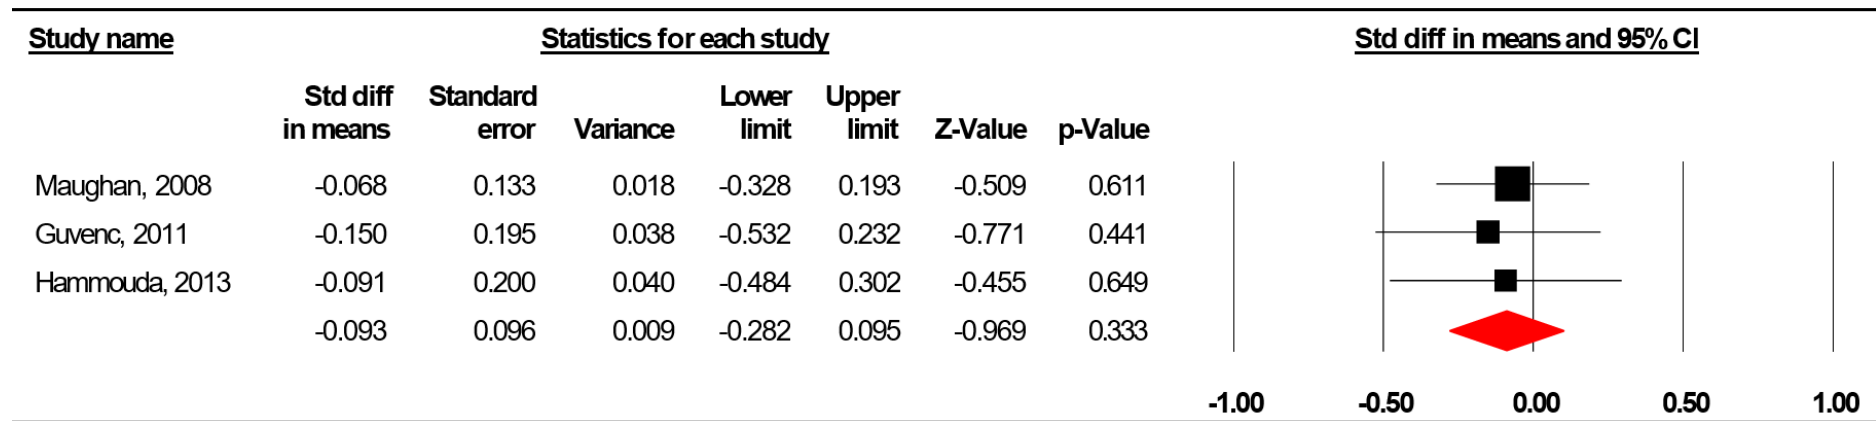

**Figure S9.** Forest plot for the effect of two weeks of Ramadan observance on body fat percentage in adolescent athletes.



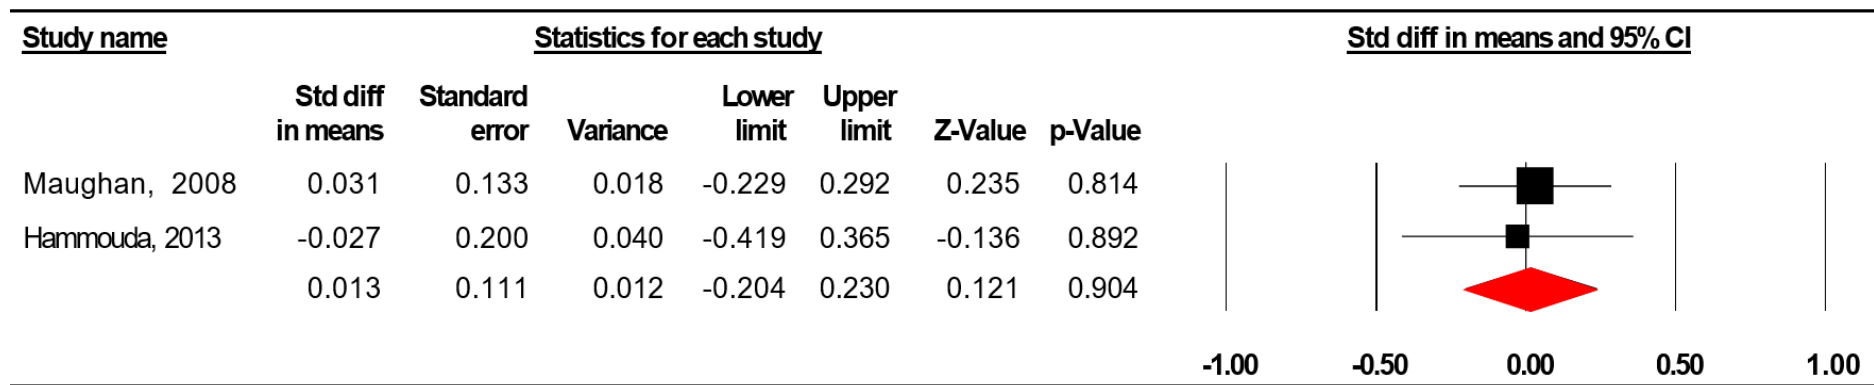

**Figure S10.** Forest plot for the effect of four weeks of Ramadan observance on body fat percentage in adolescent athletes.

### Funnel Plot of Standard Error by Std diff in means

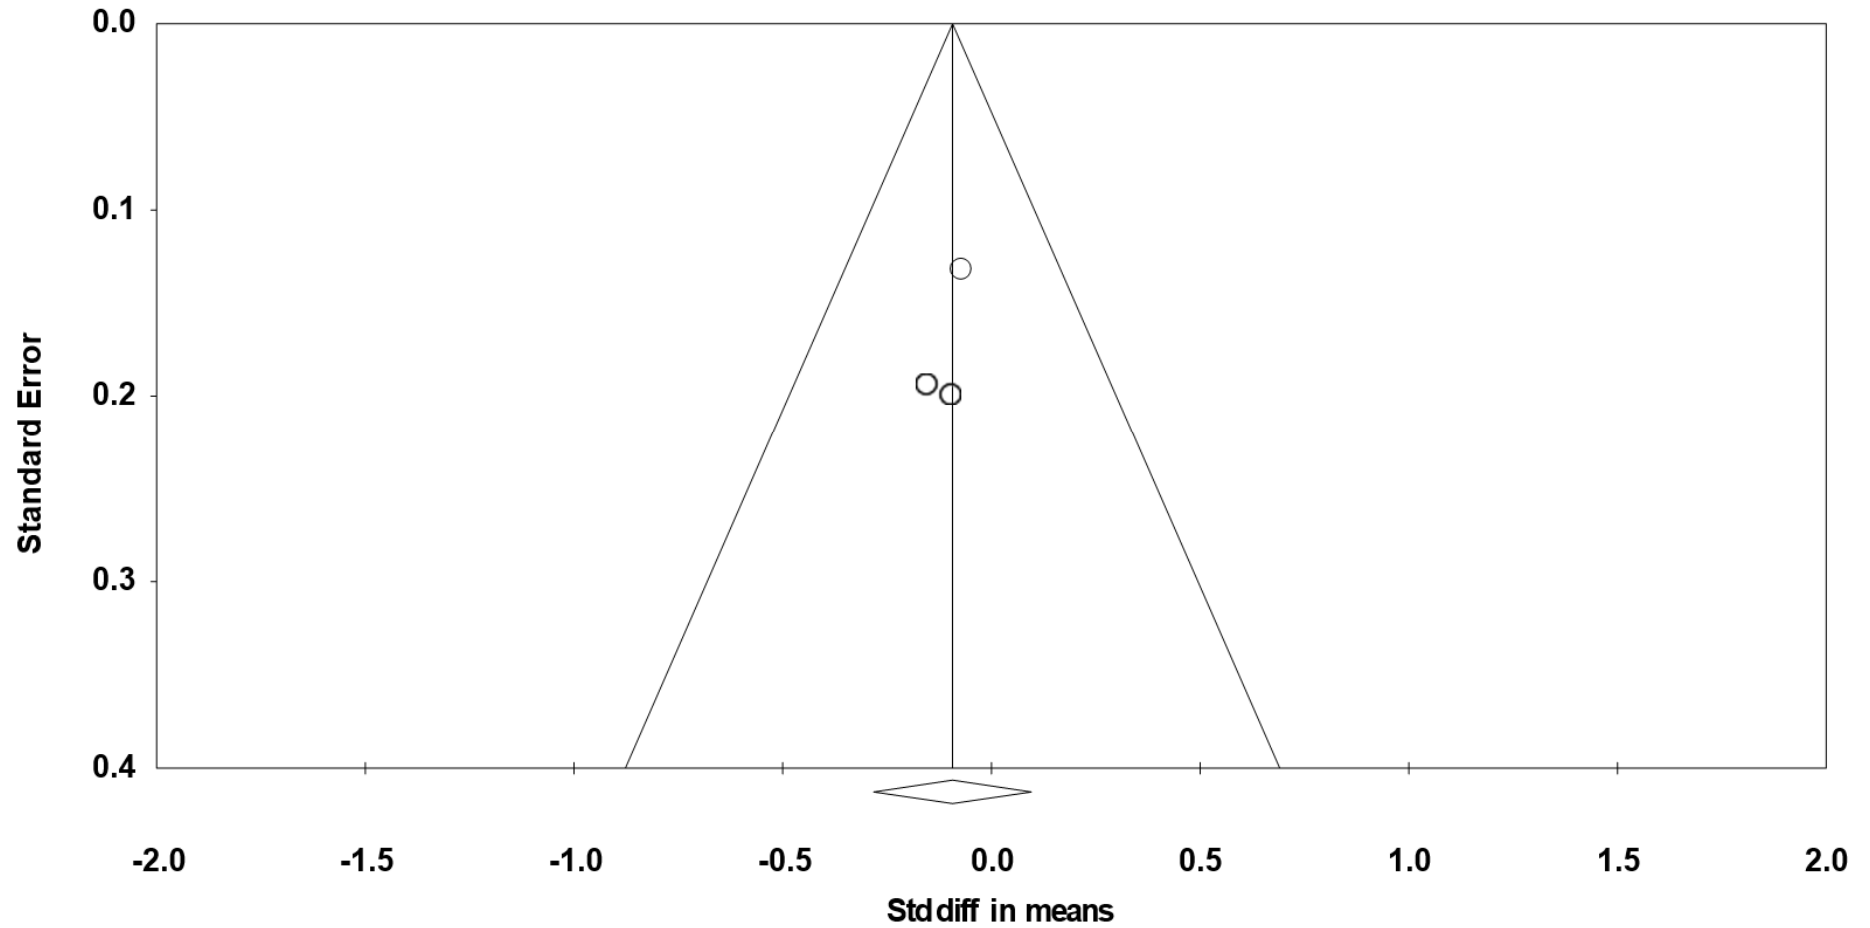

**Figure S11.** Funnel plot for the effect of four weeks of Ramadan observance on body fat percentage in adolescent athletes, showing no evidence of publication bias.

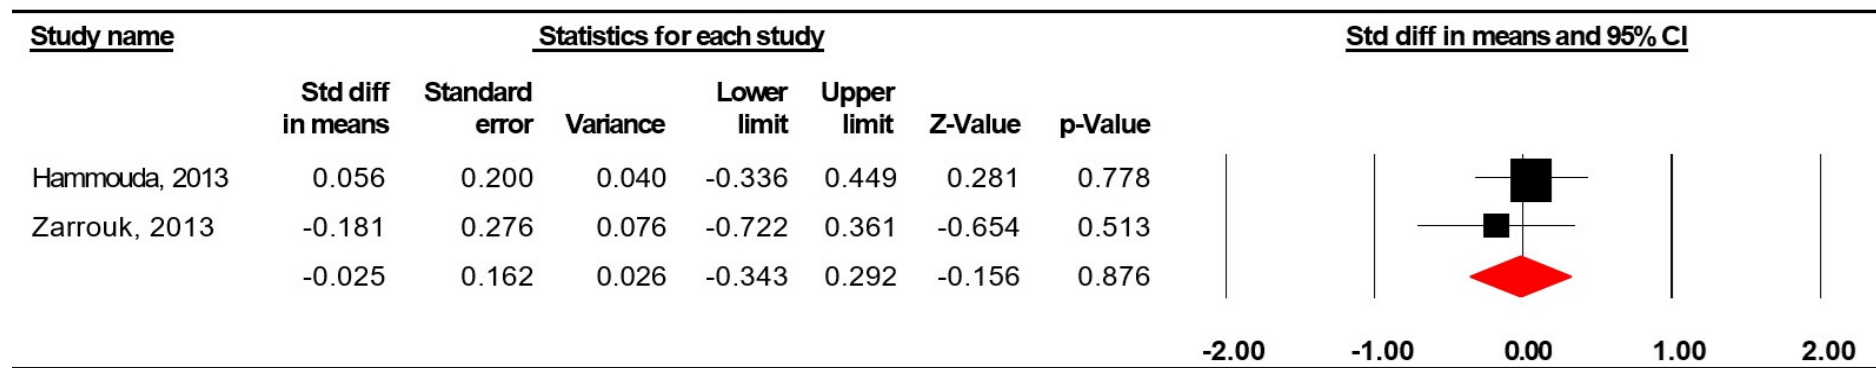

**Figure S12.** Forest plot for the effect of four weeks of Ramadan observance on lean mass in adolescent athletes.

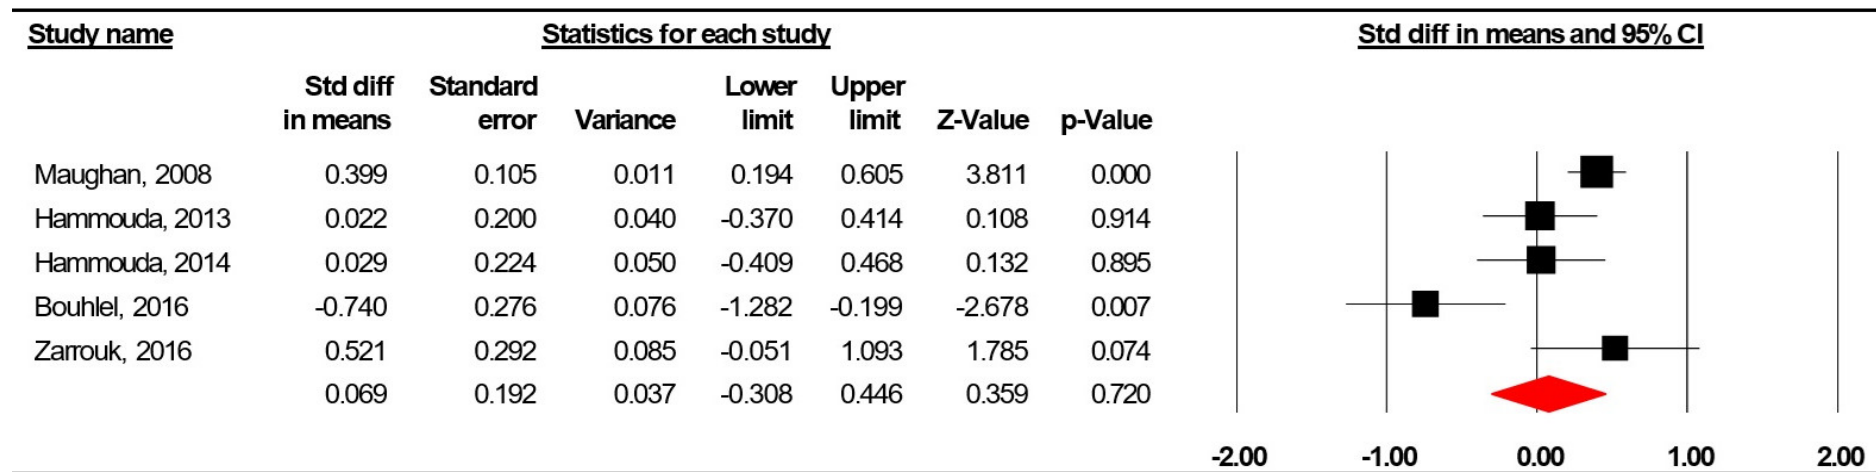

Figure S13. Forest plot for the effect of Ramadan observance on protein intake in adolescent athletes.

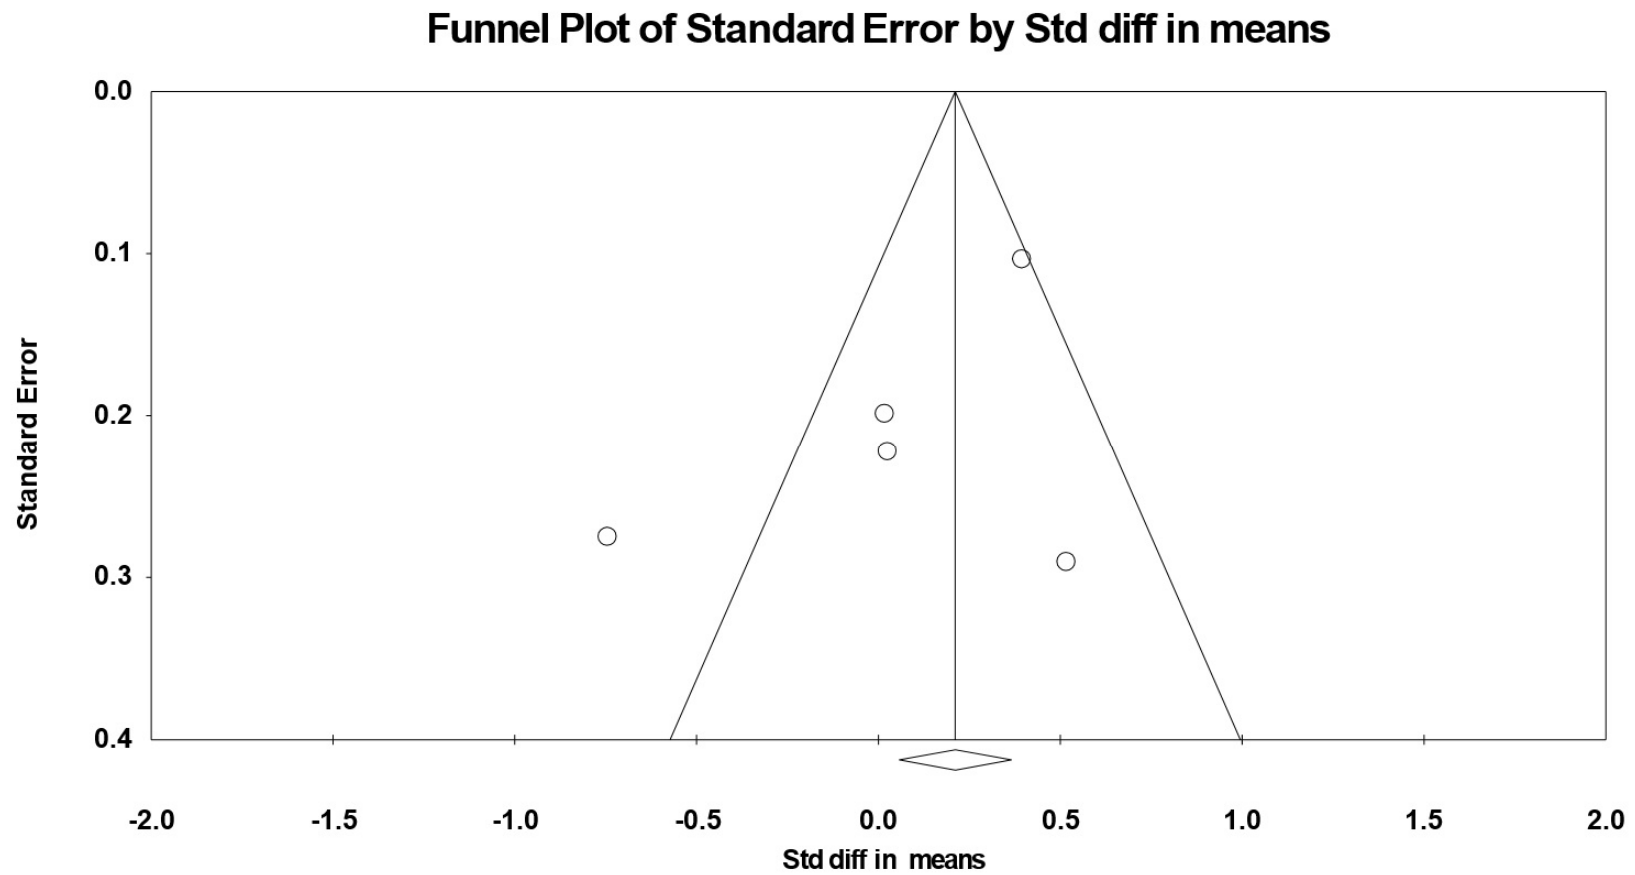

**Figure S14.** Funnel plot for protein intake in adolescent athletes during Ramadan observance showing no evidence of publication bias.

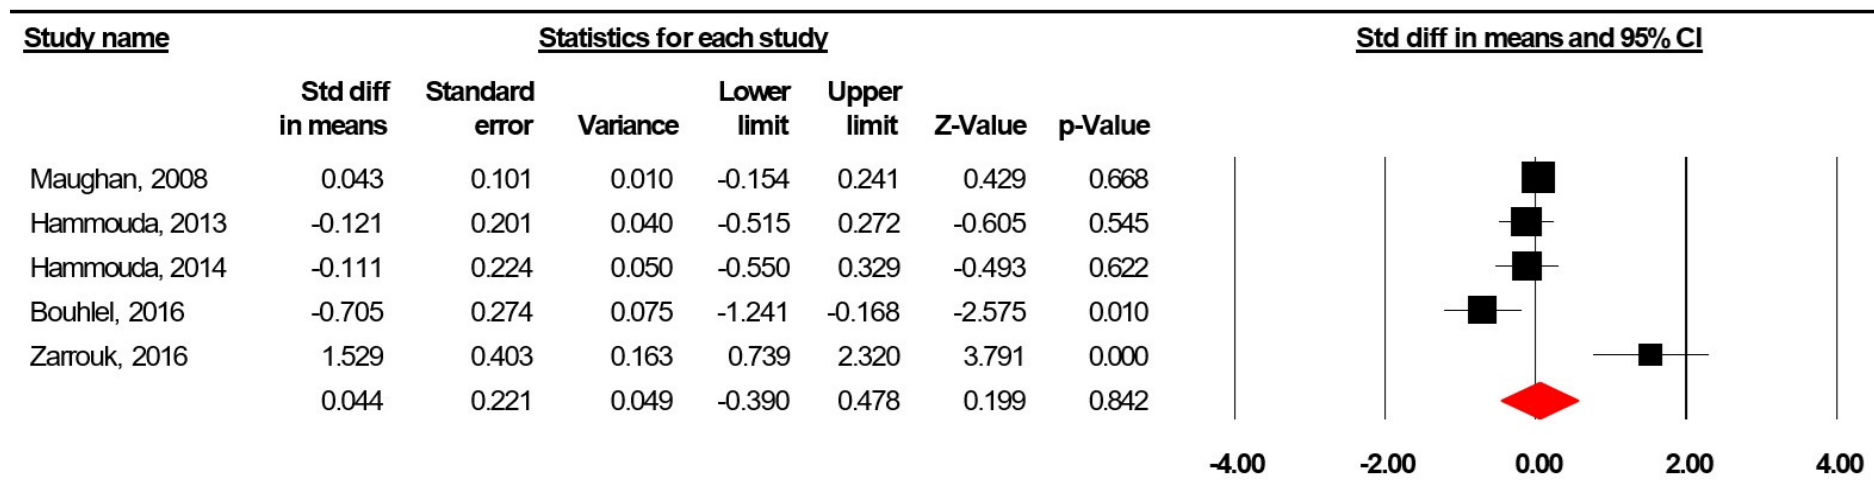

**Figure S15.** Forest plot for the effect of Ramadan observance on fat intakes in adolescent athletes.

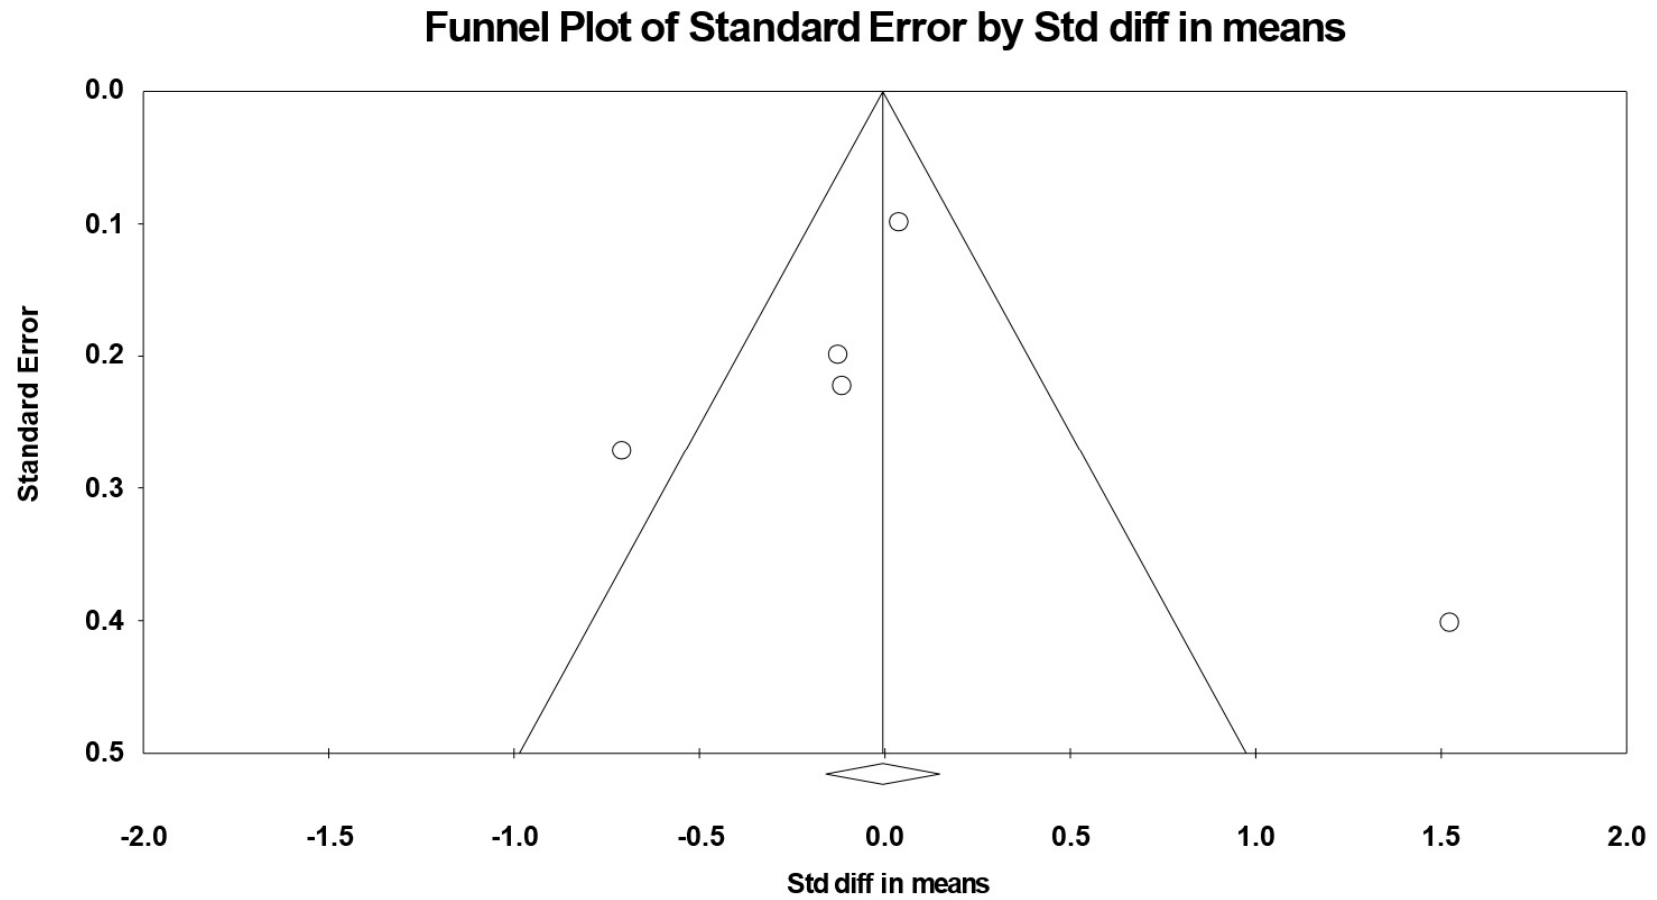

Figure S16. Funnel plot for fat intakes in adolescent athletes during Ramadan observance showing no evidence of publication bias.

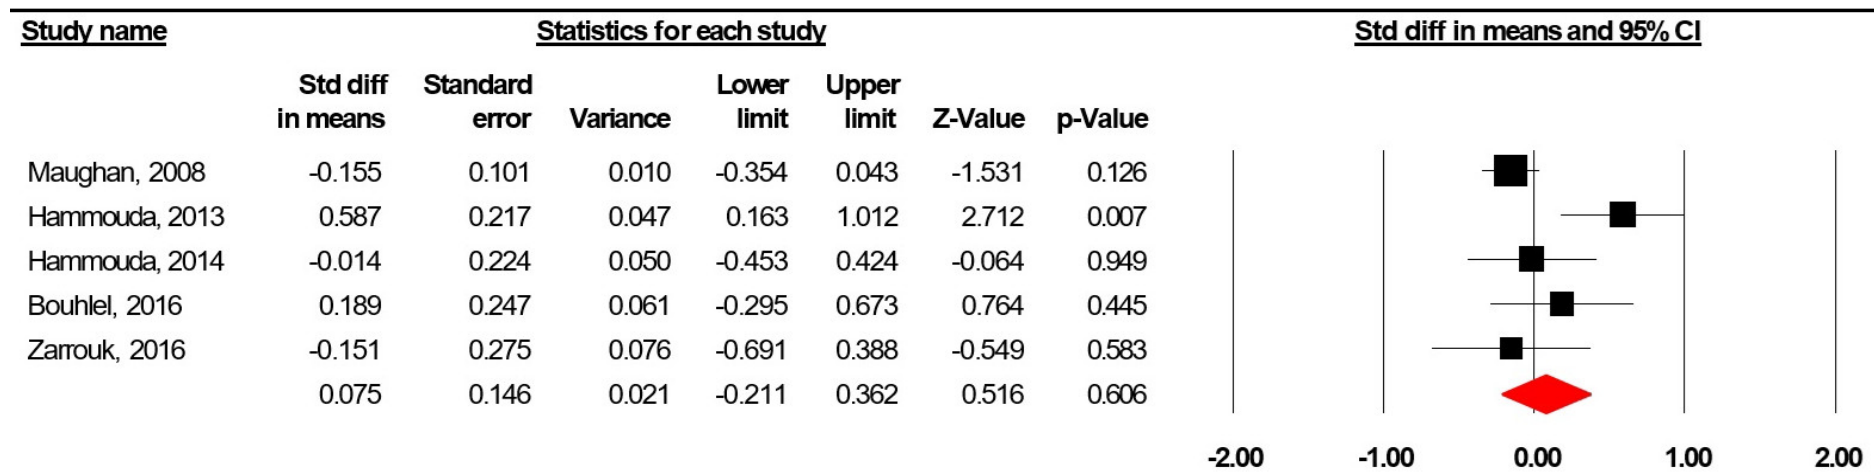

Figure S17. Forest plot for the effect of Ramadan observance on carbohydrates intakes in adolescent athletes.



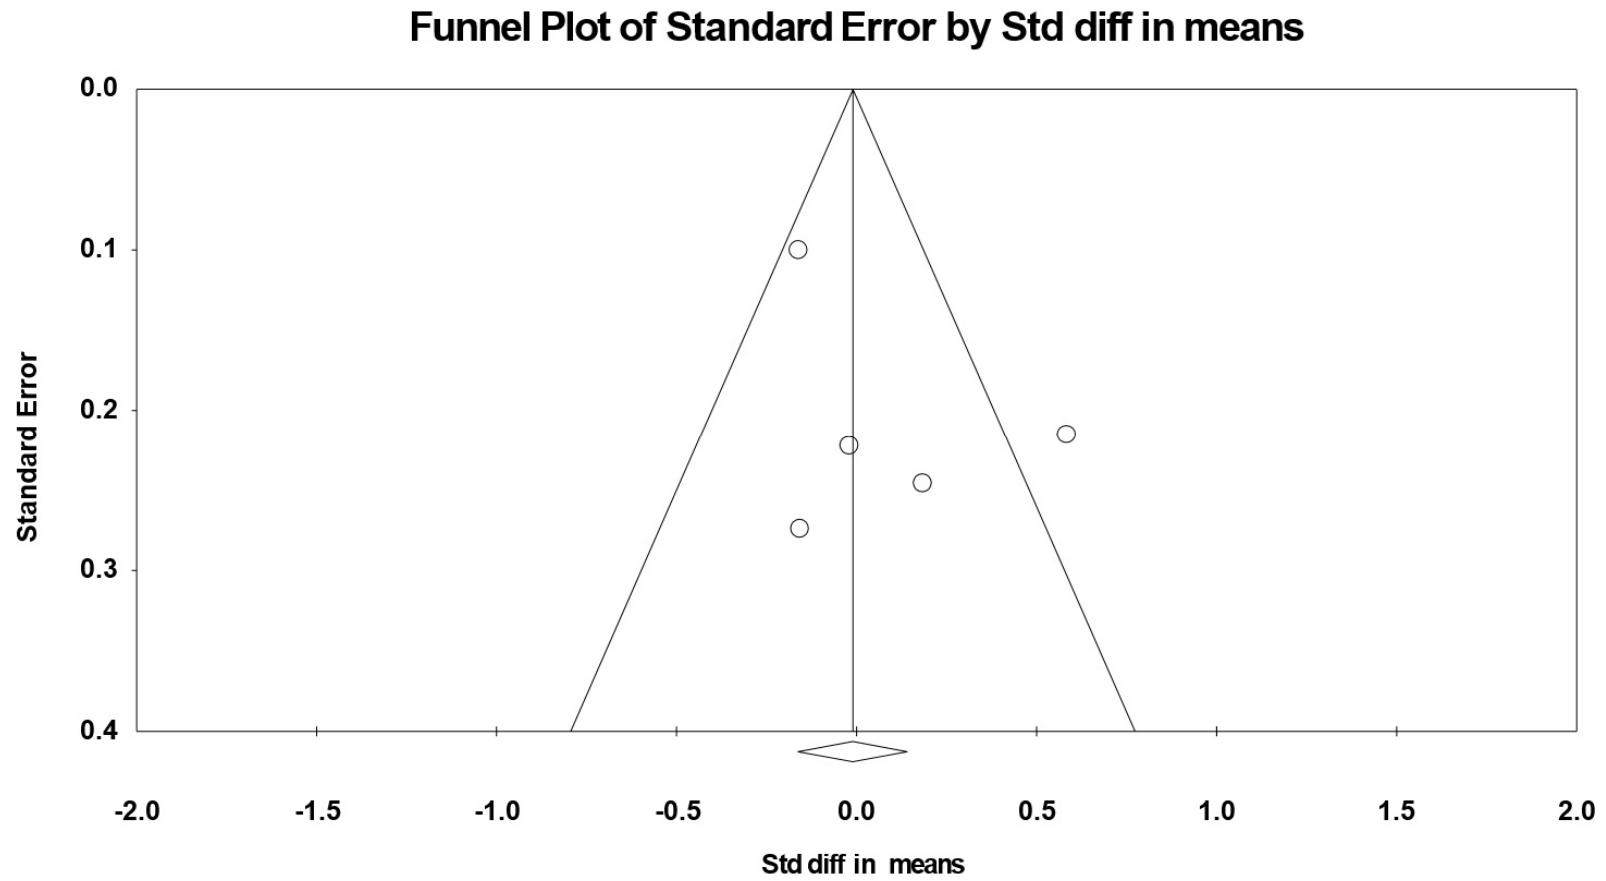

Figure S18. Funnel plot for carbohydrates intakes in adolescent athletes during Ramadan observance showing no evidence of publication bias.

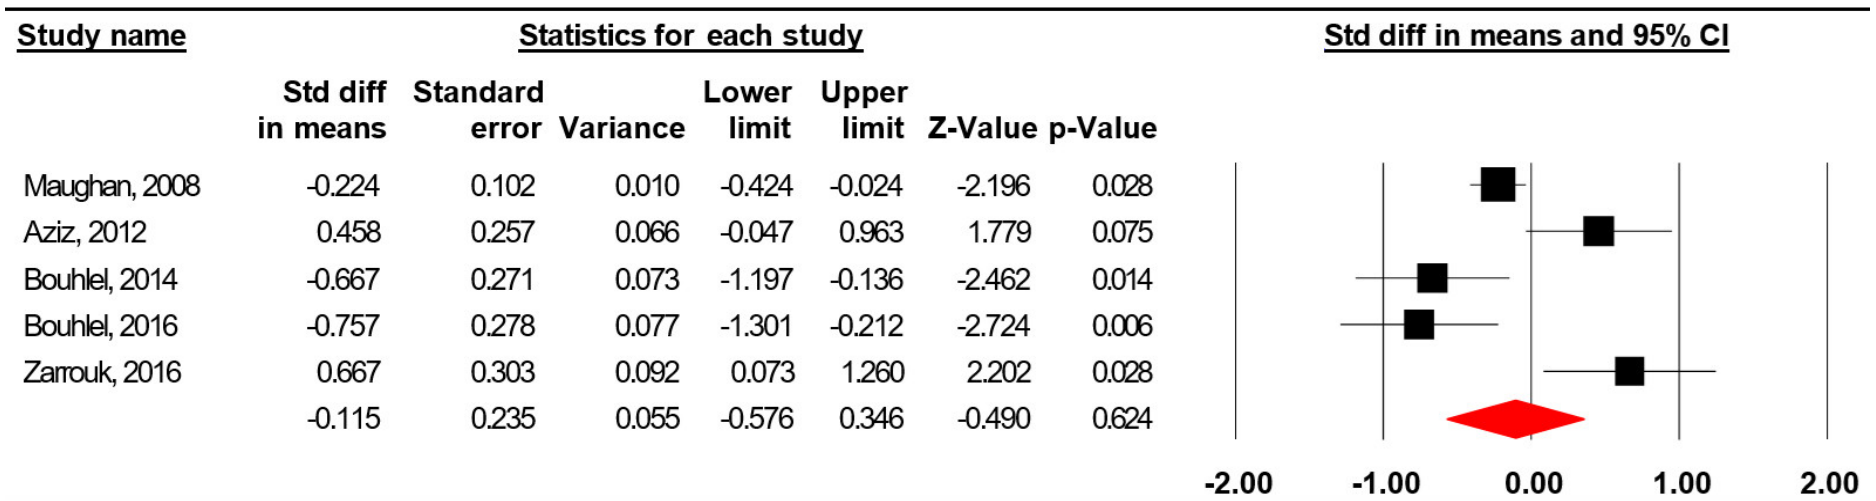

**Figure S19.** Forest plot for the effect of Ramadan observance on total water intakes in adolescent athletes.

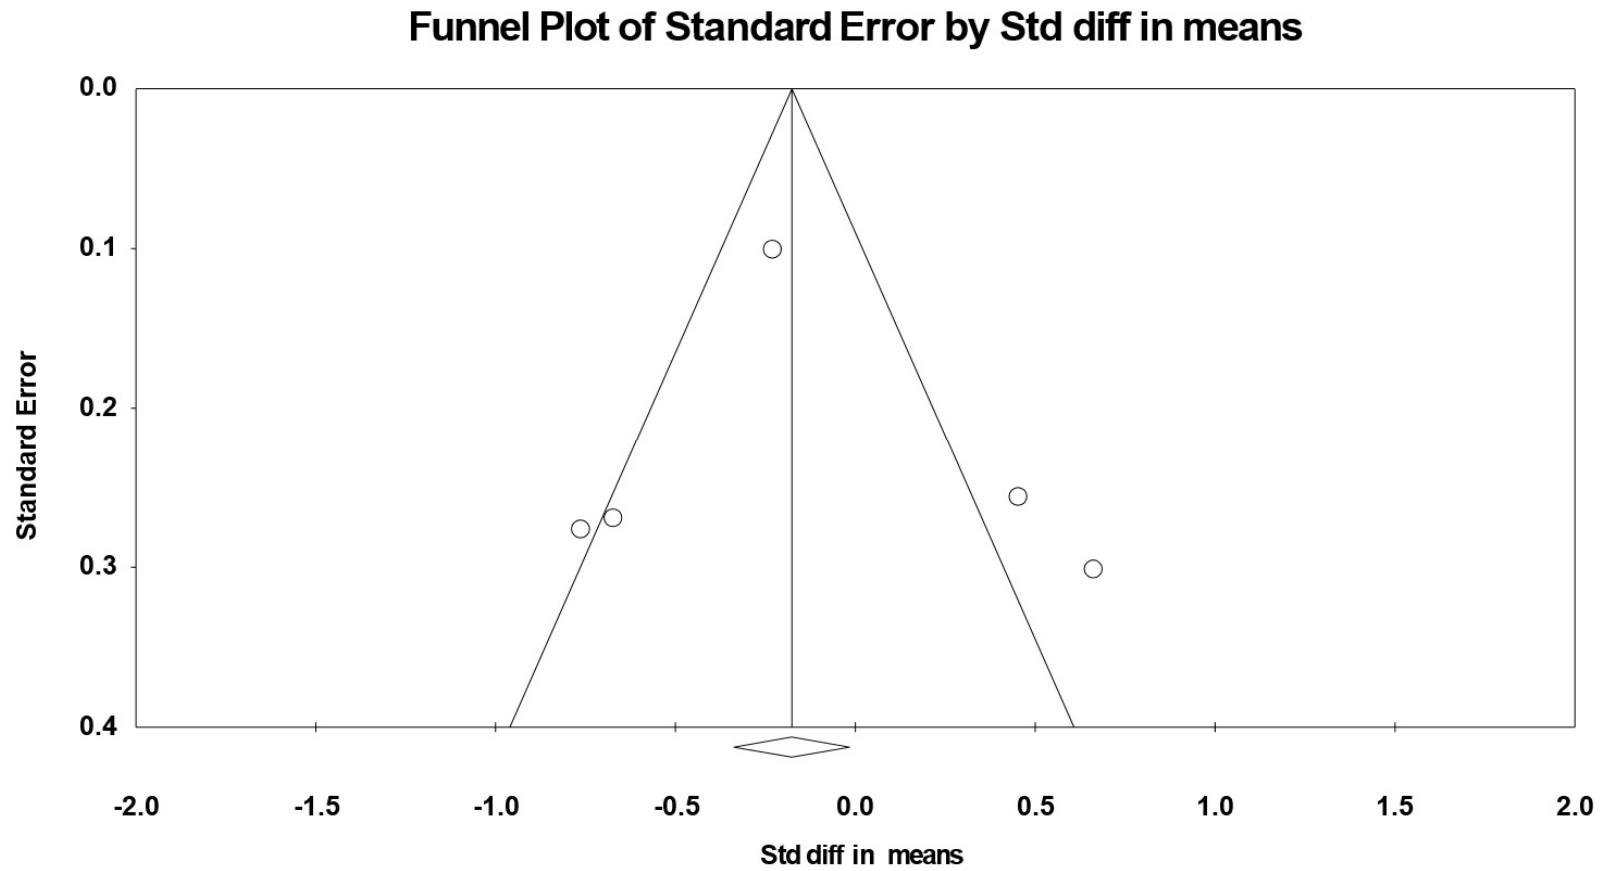

1  
2

Figure S20. Funnel plot for total water intakes in adolescent athletes during Ramadan observance showing no evidence of publication bias.
